# Supplementary material for: A high-density genetic map and growth related QTL mapping in bighead carp (Hypophthalmichthys nobilis)
Source: PubMed Central journal article supplement (PMC4921863; doi:10.1038/srep28679), 2016-06-27

**A high-density genetic map and growth related QTL mapping in  
bighead carp (*Hypophthalmichthys nobilis*)**

**Beide Fu<sup>1</sup>, Haiyang Liu<sup>1,2</sup>, Xiaomu Yu<sup>1</sup>, Jingou Tong<sup>1,\*</sup>**

<sup>1</sup>State Key Laboratory of Freshwater Ecology and Biotechnology, Institute of Hydrobiology, Chinese Academy of Sciences, Wuhan 430072, China

<sup>2</sup>University of Chinese Academy of Sciences, Beijing 100039, China

Supplementary Fig. S1. Pipeline for a 2b-RAD sequencing library construction.

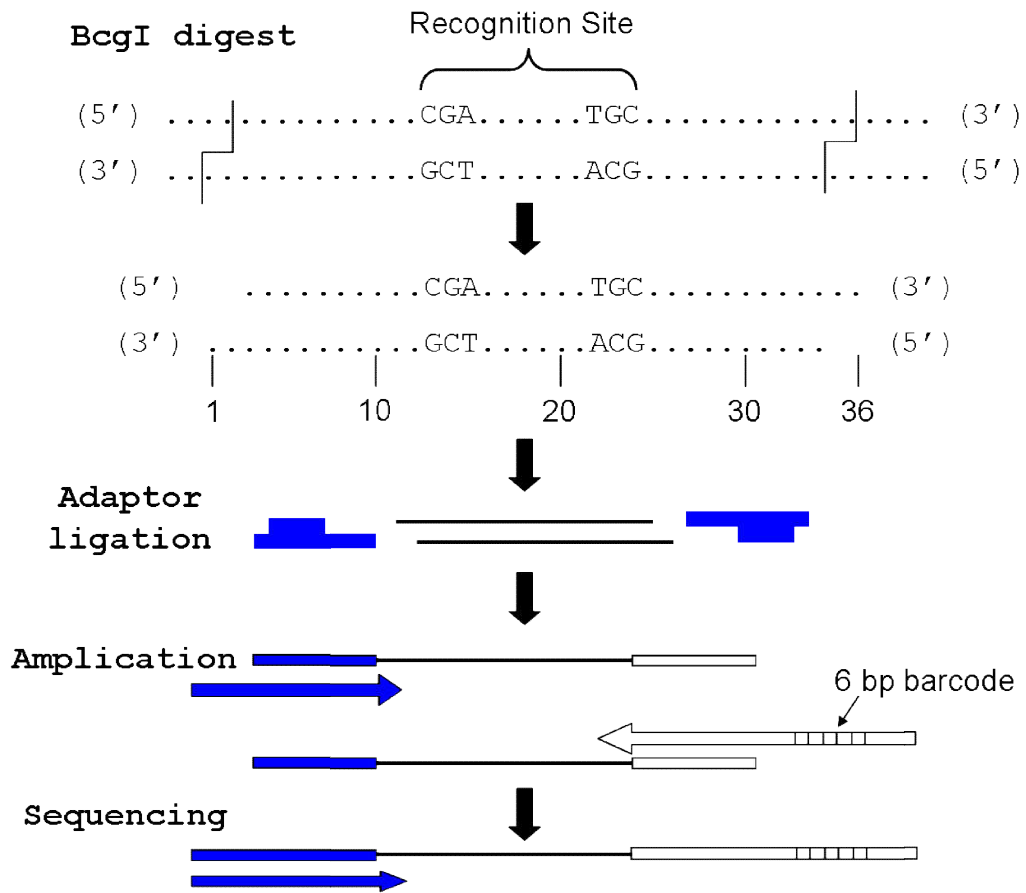

Supplementary Fig. S2 Number of markers for each segregation pattern.

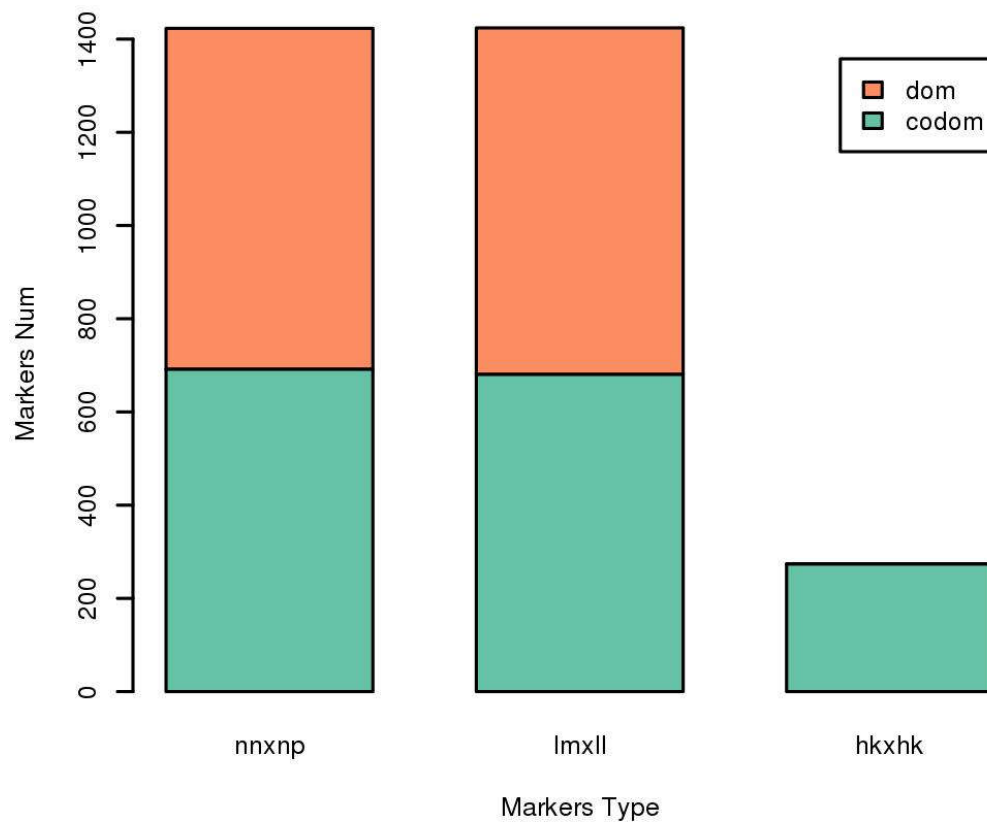

Supplement: srep28679-s1.pdf [file srep28679-s1.pdf]
